# Supplementary material
Source: Springer Nature journal article supplement (https://www.springermedizin.de/resource/supplementary/13058_2011_2968_MOESM12_ESM.pdf/9702986)

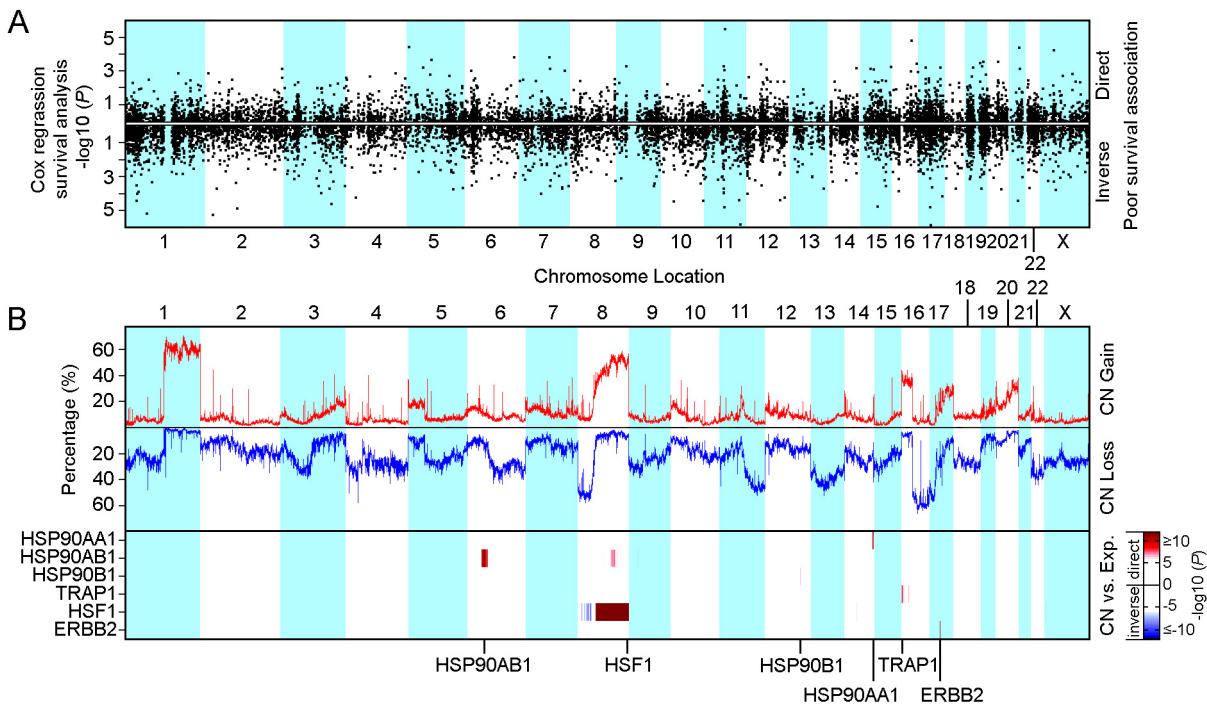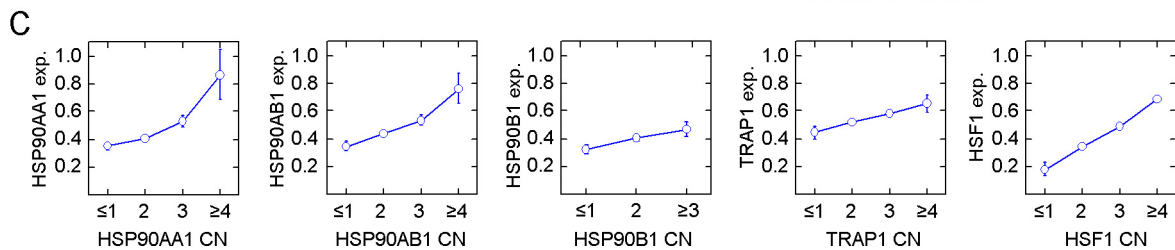

Supplement: MOESM12 [file 9702986]
